# Supplementary material for: Proteomic analysis of putative heme-binding proteins in Streptococcus pyogenes
Source: Royal Society of Chemistry journal article supplement (doi:10.1039/c4mt00027g), 2014-04-09
Supplement: c4mt00027g1.xlsx [file c4mt00027g1.xlsx]

## Sheet: Sheet1
Identified heme-binding proteins from S. pyogenes MGAS5005.
Group_NO.	Reference No.	Decription	Protein Score	Molcular_weight (Daltons)	Protein PI	Name	Number of peptides	emPAI
1	gi|71910047	glyceraldehyde-3-phosphate dehydrogenase [Streptococcus pyogenes MGAS5005]	13451	36034	5.34	M5005_Spy_0233	19	1.45
2	gi|71911460	50S ribosomal protein L13 [Streptococcus pyogenes MGAS5005]	4372	16121	9.91	M5005_Spy_1647	10	1.2
3	gi|71911593	30S ribosomal protein S2 [Streptococcus pyogenes MGAS5005]	9556	28383	5.11	M5005_Spy_1780	15	6.19
4	gi|71909875	30S ribosomal protein S5 [Streptococcus pyogenes MGAS5005]	8025	17017	9.79	M5005_Spy_0061	8	4.13
5	gi|71910691	hypothetical protein M5005_Spy_0878 [Streptococcus pyogenes MGAS5005]	7309	13146	4.93	M5005_Spy_0878	5	0.29
6	gi|71911305	enoyl-[acyl-carrier protein] reductase (NADH) [Streptococcus pyogenes MGAS5005]	6417	33838	6.33	M5005_Spy_1492	8	0.08
7	gi|71909859	50S ribosomal protein L4 [Streptococcus pyogenes MGAS5005]	6263	22112	9.8	M5005_Spy_0045	6	0.09
8	gi|71910446	50S ribosomal protein L21 [Streptococcus pyogenes MGAS5005]	3096	11148	9.76	M5005_Spy_0633	5	4.65
9	gi|71910359	50S ribosomal protein L31 type B [Streptococcus pyogenes MGAS5005]	2735	9848	8.93	M5005_Spy_0546	5	1.06
10	gi|71911036	DNA-binding protein HU [Streptococcus pyogenes MGAS5005]	3263	9641	9	M5005_Spy_1223	4	1.85
11	gi|71910802	6-phosphofructokinase [Streptococcus pyogenes MGAS5005]	2359	35726	5.33	M5005_Spy_0989	7	0.09
12	gi|71909870	50S ribosomal protein L5 [Streptococcus pyogenes MGAS5005]	3047	11148	9.34	M5005_Spy_0056	8	1.08
13	gi|71910461	30S ribosomal protein S16 [Streptococcus pyogenes MGAS5005]	2799	10245	10.28	M5005_Spy_0648	2	0.48
14	gi|71910369	phosphopyruvate hydratase [Streptococcus pyogenes MGAS5005]	3606	47325	4.77	M5005_Spy_0556	14	0.46
15	gi|71910046	elongation factor G [Streptococcus pyogenes MGAS5005]	2550	76481	4.83	M5005_Spy_0232	22	0.76
16	gi|71911138	ribosome-associated factor Y [Streptococcus pyogenes MGAS5005]	717	21087	5.11	M5005_Spy_1325	2	0.56
17	gi|71910364	50S ribosomal protein L19 [Streptococcus pyogenes MGAS5005]	1978	13137	11.1	M5005_Spy_0551	5	1.01
18	gi|71909864	30S ribosomal protein S3 [Streptococcus pyogenes MGAS5005]	1748	24119	9.64	M5005_Spy_0050	7	0.14
19	gi|71911088	arginine deiminase [Streptococcus pyogenes MGAS5005]	1427	46268	4.99	M5005_Spy_1275	7	0.01
20	gi|71909873	50S ribosomal protein L6 [Streptococcus pyogenes MGAS5005]	815	19420	9.54	M5005_Spy_0059	5	0.17
21	gi|71911292	PTS system, mannose-specific IIAB component [Streptococcus pyogenes MGAS5005]	1039	35515	5.19	M5005_Spy_1479	2	0.05
22	gi|71911574	chaperonin GroEL [Streptococcus pyogenes MGAS5005]	690	57060	4.75	M5005_Spy_1761	20	0.13
23	gi|71909858	50S ribosomal protein L3 [Streptococcus pyogenes MGAS5005]	1161	22412	10.13	M5005_Spy_0044	3	0.54
24	gi|71910564	pyruvate dehydrogenase E1 component alpha subunit [Streptococcus pyogenes MGAS5005]	2244	35422	5.12	M5005_Spy_0751	4	0.78
25	gi|71911495	multiple sugar transport ATP-binding protein [Streptococcus pyogenes MGAS5005]	758	41995	5.73	M5005_Spy_1682	5	0.19
26	gi|71911086	ornithine carbamoyltransferase [Streptococcus pyogenes MGAS5005]	722	37873	5.19	M5005_Spy_1273	4	0.33
27	gi|71910568	dihydrolipoamide dehydrogenase [Streptococcus pyogenes MGAS5005]	1194	62427	4.91	M5005_Spy_0755	12	1.02
28	gi|71910432	translation initiation factor IF-3 [Streptococcus pyogenes MGAS5005]	160	20041	9.83	M5005_Spy_0619	1	0.56
29	gi|71910188	50S ribosomal protein L1 [Streptococcus pyogenes MGAS5005]	1219	24379	9.34	M5005_Spy_0375	4	0.72
30	gi|71909863	50S ribosomal protein L22 [Streptococcus pyogenes MGAS5005]	1585	12423	11.04	M5005_Spy_0049	4	3.85
31	gi|71910565	pyruvate dehydrogenase E1 component beta subunit [Streptococcus pyogenes MGAS5005]	729	35945	4.86	M5005_Spy_0752	6	0.04
32	gi|71911062	cell division protein FtsZ [Streptococcus pyogenes MGAS5005]	555	46403	4.53	M5005_Spy_1249	18	0.08
33	gi|71910045	30S ribosomal protein S7 [Streptococcus pyogenes MGAS5005]	1261	17640	10.17	M5005_Spy_0231	3	0.88
34	gi|71911410	MerR family transcriptional regulator [Streptococcus pyogenes MGAS5005]	1498	14367	9.57	M5005_Spy_1597	4	0.22
35	gi|71909898	DNA-directed RNA polymerase subunit beta [Streptococcus pyogenes MGAS5005]	836	135399	6.51	M5005_Spy_0084	13	0.17
36	gi|71910977	phosphoglyceromutase [Streptococcus pyogenes MGAS5005]	865	26020	5.1	M5005_Spy_1164	3	0.42
37	gi|71909883	30S ribosomal protein S11 [Streptococcus pyogenes MGAS5005]	802	13362	11.22	M5005_Spy_0069	2	0.19
38	gi|71910008	glycerol-3-phosphate dehydrogenase [Streptococcus pyogenes MGAS5005]	652	29091	6.25	M5005_Spy_0194	5	0.12
39	gi|71910006	UTP--glucose-1-phosphate uridylyltransferase [Streptococcus pyogenes MGAS5005]	461	33282	6.12	M5005_Spy_0192	5	0.45
40	gi|71909885	50S ribosomal protein L17 [Streptococcus pyogenes MGAS5005]	795	14513	9.81	M5005_Spy_0071	5	3.18
41	gi|71911670	inositol-5-monophosphate dehydrogenase [Streptococcus pyogenes MGAS5005]	616	52774	5.65	M5005_Spy_1857	12	1.22
42	gi|71910300	hypothetical protein M5005_Spy_0487 [Streptococcus pyogenes MGAS5005]	150	16080	4.78	M5005_Spy_0487	4	0.12
43	gi|71910154	L-lactate oxidase [Streptococcus pyogenes MGAS5005]	1053	42553	5.26	M5005_Spy_0340	7	1.18
44	gi|71911628	50S ribosomal protein L32 [Streptococcus pyogenes MGAS5005]	332	6861	10.53	M5005_Spy_1815	1	0.04
45	gi|71910728	signal recognition particle, subunit FFH/SRP54 [Streptococcus pyogenes MGAS5005]	623	57492	8.33	M5005_Spy_0915	4	0.08
46	gi|71910566	branched-chain alpha-keto acid dehydrogenase subunit E2 [Streptococcus pyogenes MGAS5005]	557	49770	5.21	M5005_Spy_0753	7	0.15
47	gi|71911415	kinase related to hydroxyacetone kinase [Streptococcus pyogenes MGAS5005]	445	59103	4.42	M5005_Spy_1602	3	0.51
48	gi|71911451	galactose-6-phosphate isomerase subunit LacA [Streptococcus pyogenes MGAS5005]	366	15417	5.22	M5005_Spy_1638	3	0.26
49	gi|71909868	50S ribosomal protein L14 [Streptococcus pyogenes MGAS5005]	590	13053	10.18	M5005_Spy_0054	3	0.32
50	gi|71910394	F0F1 ATP synthase subunit beta [Streptococcus pyogenes MGAS5005]	761	51023	4.73	M5005_Spy_0581	2	0.15
51	gi|71909874	50S ribosomal protein L18 [Streptococcus pyogenes MGAS5005]	890	12858	10.4	M5005_Spy_0060	3	0.31
52	gi|71909897	DNA-directed RNA polymerase subunit beta [Streptococcus pyogenes MGAS5005]	361	132708	4.97	M5005_Spy_0083	11	0.36
53	gi|71910023	jag protein [Streptococcus pyogenes MGAS5005]	537	33847	5.14	M5005_Spy_0209	7	0.04
54	gi|71911311	molecular chaperone DnaK [Streptococcus pyogenes MGAS5005]	725	64880	4.62	M5005_Spy_1498	14	0.06
55	gi|71911211	galactose-6-phosphate isomerase subunit LacA [Streptococcus pyogenes MGAS5005]	233	15117	5.12	M5005_Spy_1398	3	0.04
56	gi|71910664	phosphotransacetylase [Streptococcus pyogenes MGAS5005]	430	29302	4.73	M5005_Spy_0851	3	0.15
57	gi|161936118	arginyl-tRNA synthetase [Streptococcus pyogenes MGAS5005]	649	63081	5.1	M5005_Spy_1808	5	0.09
58	gi|71910871	maltose/maltodextrin-binding protein [Streptococcus pyogenes MGAS5005]	340	53170	9.10	M5005_Spy_1058	4	0.14
59	gi|71911581	peroxiredoxin reductase (NAD(P)H) [Streptococcus pyogenes MGAS5005]	1161	20470	4.65	M5005_Spy_1768	5	0.07
60	gi|71910605	NAD(P)H-dependent quinone reductase [Streptococcus pyogenes MGAS5005]	381	22578	5.37	M5005_Spy_0792	2	0.34
61	gi|71911420	fructose-bisphosphate aldolase [Streptococcus pyogenes MGAS5005]	1024	31189	4.87	M5005_Spy_1607	5	0.02
62	gi|71909872	30S ribosomal protein S8 [Streptococcus pyogenes MGAS5005]	172	14793	9.62	M5005_Spy_0058	2	1.02
63	gi|71910528	30S ribosomal protein S1 [Streptococcus pyogenes MGAS5005]	479	43823	4.9	M5005_Spy_0715	6	0.03
64	gi|71911382	formate acetyltransferase [Streptococcus pyogenes MGAS5005]	922	87473	5.09	M5005_Spy_1569	2	0.44
65	gi|71910560	Zn-dependent hydrolase [Streptococcus pyogenes MGAS5005]	268	61155	5.54	M5005_Spy_0747	2	0.42
66	gi|71909860	50S ribosomal protein L23 [Streptococcus pyogenes MGAS5005]	532	10725	9.62	M5005_Spy_0046	6	0.82
67	gi|71911279	phage protein [Streptococcus pyogenes MGAS5005]	477	19430	9.93	M5005_Spy_1466	1	0.81
68	gi|71909857	30S ribosomal protein S10 [Streptococcus pyogenes MGAS5005]	210	11606	9.92	M5005_Spy_0043	2	2.78
69	gi|71910534	hypothetical protein M5005_Spy_0721 [Streptococcus pyogenes MGAS5005]	127	6345	10.28	M5005_Spy_0721	18	6.45
70	gi|71909861	50S ribosomal protein L2 [Streptococcus pyogenes MGAS5005]	170	29858	10.57	M5005_Spy_0047	2	0.42
71	gi|161936124	50S ribosomal protein L10 [Streptococcus pyogenes MGAS5005]	197	17554	5.19	M5005_Spy_0795	2	0.51
72	gi|71911612	recombinase A [Streptococcus pyogenes MGAS5005]	223	40564	5.05	M5005_Spy_1799	4	0.09
73	gi|71911654	L-serine dehydratase [Streptococcus pyogenes MGAS5005]	317	24052	6.7	M5005_Spy_1841	2	0.34
74	gi|71910458	ABC transporter ATP-binding protein [Streptococcus pyogenes MGAS5005]	291	26139	6.93	M5005_Spy_0645	2	0.17
75	gi|71910648	class B acid phosphatase [Streptococcus pyogenes MGAS5005]	172	13333	5.24	M5005_Spy_0835	1	0.1
76	gi|71910063	oligopeptide-binding protein [Streptococcus pyogenes MGAS5005]	421	72058	5.39	M5005_Spy_0249	5	0.12
77	gi|71910801	pyruvate kinase [Streptococcus pyogenes MGAS5005]	216	54501	4.96	M5005_Spy_0988	3	0.58
78	gi|71910655	redox-sensing transcriptional repressor Rex [Streptococcus pyogenes MGAS5005]	246	23812	6.7	M5005_Spy_0842	8	0.04
79	gi|71911108	putative cytoplasmic protein [Streptococcus pyogenes MGAS5005]	238	14248	9.6	M5005_Spy_1295	1	0.23
80	gi|71910067	oligopeptide transport ATP-binding protein [Streptococcus pyogenes MGAS5005]	139	34694	6.12	M5005_Spy_0253	3	0.84
81	gi|71910395	F0F1 ATP synthase subunit epsilon [Streptococcus pyogenes MGAS5005]	699	15544	6.98	M5005_Spy_0582	2	0.76
82	gi|71911034	phage protein [Streptococcus pyogenes MGAS5005]	139	9465	8.96	M5005_Spy_1221	10	0.12
83	gi|71911302	3-oxoacyl-(acyl carrier protein) synthase II [Streptococcus pyogenes MGAS5005]	1282	43852	5.36	M5005_Spy_1489	12	0.02
84	gi|71911303	3-ketoacyl-(acyl-carrier-protein) reductase [Streptococcus pyogenes MGAS5005]	258	25913	5.52	M5005_Spy_1490	2	1.04
85	gi|71911194	glycerol kinase [Streptococcus pyogenes MGAS5005]	168	56018	4.93	M5005_Spy_1381	15	1.99
86	gi|71910935	glutaredoxin [Streptococcus pyogenes MGAS5005]	190	8203	6.05	M5005_Spy_1122	2	1.24
87	gi|71911310	chaperone protein [Streptococcus pyogenes MGAS5005]	305	40972	6.76	M5005_Spy_1497	3	0.16
88	gi|71910507	ATP-dependent protease ATP-binding subunit [Streptococcus pyogenes MGAS5005]	318	77300	5.58	M5005_Spy_0694	2	0.14
89	gi|71910754	nucleoside transport ATP-binding protein [Streptococcus pyogenes MGAS5005]	232	56211	6.27	M5005_Spy_0941	2	0.26
90	gi|71910594	PTS system mannose/fructose family IIB subunit [Streptococcus pyogenes MGAS5005]	103	17923	6.13	M5005_Spy_0781	1	0.05
91	gi|71911188	transketolase [Streptococcus pyogenes MGAS5005]	350	71308	4.88	M5005_Spy_1375	2	0.18
92	gi|71910175	glucosamine-1-phosphate acetyltransferase/UDP-N-acetylglucosamine pyrophosphorylase [Streptococcus pyogenes MGAS5005]	164	49659	6.32	M5005_Spy_0362	6	0.03
93	gi|71911195	hypothetical protein M5005_Spy_1382 [Streptococcus pyogenes MGAS5005]	443	14649	4.89	M5005_Spy_1382	1	2.51
94	gi|71911320	aspartyl/glutamyl-tRNA amidotransferase subunit A [Streptococcus pyogenes MGAS5005]	206	52258	5.03	M5005_Spy_1507	5	0.48
95	gi|71910932	NADP-dependent glyceraldehyde-3-phosphate dehydrogenase [Streptococcus pyogenes MGAS5005]	237	50337	5.06	M5005_Spy_1119	6	0.36
96	gi|71910405	ABC transporter ATP-binding protein [Streptococcus pyogenes MGAS5005]	245	24605	6.17	M5005_Spy_0592	1	0.67
97	gi|71911297	acetyl-CoA carboxylase subunit alpha [Streptococcus pyogenes MGAS5005]	295	28164	5.24	M5005_Spy_1484	1	0.2
98	gi|71910448	50S ribosomal protein L27 [Streptococcus pyogenes MGAS5005]	105	10398	10.48	M5005_Spy_0635	2	1.74
99	gi|71910090	potassium uptake protein [Streptococcus pyogenes MGAS5005]	107	24972	6.61	M5005_Spy_0276	2	1.12
100	gi|71910958	superoxide dismutase [Streptococcus pyogenes MGAS5005]	174	22669	4.87	M5005_Spy_1145	2	1.66
101	gi|71910799	D-fructose-6-phosphate amidotransferase [Streptococcus pyogenes MGAS5005]	637	65524	5.1	M5005_Spy_0986	6	0.35
102	gi|71911053	ATP-dependent Clp protease ATP-binding subunit [Streptococcus pyogenes MGAS5005]	724	84714	5.23	M5005_Spy_1240	8	0.12
103	gi|71911057	cell division initiation protein [Streptococcus pyogenes MGAS5005]	395	28916	4.47	M5005_Spy_1244	2	0.52
104	gi|71911412	phosphoglycerate kinase [Streptococcus pyogenes MGAS5005]	397	42104	4.82	M5005_Spy_1599	1	0.35
105	gi|71910322	triosephosphate isomerase [Streptococcus pyogenes MGAS5005]	1885	26886	4.57	M5005_Spy_0509	6	0.41
106	gi|71909832	ribose-phosphate pyrophosphokinase [Streptococcus pyogenes MGAS5005]	188	35021	5.74	M5005_Spy_0018	2	0.03
107	gi|71911347	preprotein translocase subunit SecA [Streptococcus pyogenes MGAS5005]	237	94645	5.67	M5005_Spy_1534	5	0.75
108	gi|71910759	30S ribosomal protein S20 [Streptococcus pyogenes MGAS5005]	143	8307	10.29	M5005_Spy_0946	1	1.18
109	gi|71911649	50S ribosomal protein L9 [Streptococcus pyogenes MGAS5005]	146	16502	9.4	M5005_Spy_1836	1	0.41
110	gi|71911189	putative translaldolase [Streptococcus pyogenes MGAS5005]	162	23257	5.01	M5005_Spy_1376	9	0.23
111	gi|71910804	GntR family transcriptional regulator [Streptococcus pyogenes MGAS5005]	247	14196	5.71	M5005_Spy_0991	8	1.36
112	gi|71911286	hypothetical protein M5005_Spy_1473 [Streptococcus pyogenes MGAS5005]	73	13483	8.93	M5005_Spy_1473	2	0.53
113	gi|71909865	50S ribosomal protein L16 [Streptococcus pyogenes MGAS5005]	150	15442	10.66	M5005_Spy_0051	1	1.89
114	gi|71911153	DNA-directed RNA polymerase subunit omega [Streptococcus pyogenes MGAS5005]	205	11837	5.53	M5005_Spy_1340	5	0.19
115	gi|71909876	50S ribosomal protein L30 [Streptococcus pyogenes MGAS5005]	305	6438	10.12	M5005_Spy_0062	2	0.33
116	gi|71910120	CBS domain-containing protein [Streptococcus pyogenes MGAS5005]	64	17645	5.68	M5005_Spy_0306	2	0.42
117	gi|71910738	anaerobic ribonucleoside-triphosphate reductase [Streptococcus pyogenes MGAS5005]	244	13944	6.51	M5005_Spy_0925	3	0.96
118	gi|71909955	streptolysin O [Streptococcus pyogenes MGAS5005]	231	63615	7.6	M5005_Spy_0141	4	0.66
119	gi|71910660	GTP pyrophosphokinase [Streptococcus pyogenes MGAS5005]	94	26271	5.15	M5005_Spy_0847	2	0.09
120	gi|71909970	putative L-ascorbate 6-phosphate lactonase [Streptococcus pyogenes MGAS5005]	120	41788	5.23	M5005_Spy_0156	5	0.08
121	gi|71910719	citrate lyase beta chain/citryl-CoA lyase subunit [Streptococcus pyogenes MGAS5005]	92	31056	5.08	M5005_Spy_0906	2	0.53
122	gi|71910751	phosphoglucomutase/phosphomannomutase [Streptococcus pyogenes MGAS5005]	1579	63293	4.78	M5005_Spy_0938	2	0.12
123	gi|71910042	purine operon repressor [Streptococcus pyogenes MGAS5005]	135	30706	7.7	M5005_Spy_0228	2	0.99
124	gi|71910511	purine nucleoside phosphorylase [Streptococcus pyogenes MGAS5005]	93	28863	4.98	M5005_Spy_0698	1	0.45
125	gi|71909877	50S ribosomal protein L15 [Streptococcus pyogenes MGAS5005]	165	15411	10.5	M5005_Spy_0063	2	0.25
126	gi|71910049	amino acid transport ATP-binding protein [Streptococcus pyogenes MGAS5005]	136	27515	5.39	M5005_Spy_0235	1	0.07
127	gi|71910634	GTP cyclohydrolase I [Streptococcus pyogenes MGAS5005]	163	21044	7.76	M5005_Spy_0821	1	1.38
128	gi|71911400	uridine phosphorylase [Streptococcus pyogenes MGAS5005]	448	28096	5.11	M5005_Spy_1587	5	1.26
129	gi|71910504	ATP-dependent protease ATP-binding subunit [Streptococcus pyogenes MGAS5005]	360	44991	4.86	M5005_Spy_0691	3	0.71
130	gi|71910796	histidine transport ATP-binding protein [Streptococcus pyogenes MGAS5005]	157	23051	5.23	M5005_Spy_0983	1	0.06
131	gi|71911327	universal stress protein [Streptococcus pyogenes MGAS5005]	76	16842	5.36	M5005_Spy_1514	2	1.05
132	gi|71911576	negative regulator of genetic competence [Streptococcus pyogenes MGAS5005]	192	90657	6.42	M5005_Spy_1763	3	0.19
133	gi|71911359	Gls24 family general stress protein [Streptococcus pyogenes MGAS5005]	44	14127	4.76	M5005_Spy_1546	2	0.22
134	gi|71911473	polynucleotide phosphorylase/polyadenylase [Streptococcus pyogenes MGAS5005]	92	77348	4.92	M5005_Spy_1660	3	0.36
135	gi|71909869	50S ribosomal protein L24 [Streptococcus pyogenes MGAS5005]	145	10924	9.91	M5005_Spy_0055	2	0.15
136	gi|71911300	(3R)-hydroxymyristoyl-ACP dehydratase [Streptococcus pyogenes MGAS5005]	99	15445	6.91	M5005_Spy_1487	1	0.1
137	gi|71909908	acetate kinase [Streptococcus pyogenes MGAS5005]	92	43519	5.28	M5005_Spy_0094	2	0.19
138	gi|71911299	acetyl-CoA carboxylase biotin carboxylase subunit [Streptococcus pyogenes MGAS5005]	623	49313	4.99	M5005_Spy_1486	4	0.42
139	gi|71910878	alpha-amylase [Streptococcus pyogenes MGAS5005]	49	79496	5.6	M5005_Spy_1065	5	0.11
140	gi|71910921	S-adenosylmethionine synthetase [Streptococcus pyogenes MGAS5005]	302	43153	4.8	M5005_Spy_1108	4	0.08
141	gi|71910384	endonuclease/exonuclease/phosphatase family protein [Streptococcus pyogenes MGAS5005]	148	99744	6.36	M5005_Spy_0571	19	0.12
142	gi|71909882	30S ribosomal protein S13 [Streptococcus pyogenes MGAS5005]	60	13417	10.52	M5005_Spy_0068	2	1.07
143	gi|71911210	galactose-6-phosphate isomerase subunit LacB [Streptococcus pyogenes MGAS5005]	50	18913	5.33	M5005_Spy_1397	2	0.25
144	gi|71910890	glutamine transport ATP-binding protein [Streptococcus pyogenes MGAS5005]	228	27145	5.03	M5005_Spy_1077	2	0.28
145	gi|71910142	ATP-dependent Clp protease proteolytic subunit [Streptococcus pyogenes MGAS5005]	560	21649	5.38	M5005_Spy_0328	4	0.14
146	gi|71909862	30S ribosomal protein S19[Streptococcus pyogenes MGAS5005]	98	10616	9.94	M5005_Spy_0048	1	0.85
147	gi|71910658	ribose-phosphate pyrophosphokinase [Streptococcus pyogenes MGAS5005]	79	35686	6.03	M5005_Spy_0845	2	0.09
148	gi|71910155	lactocepin [Streptococcus pyogenes MGAS5005]	158	181090	6.15	M5005_Spy_0341	6	0.11
149	gi|71910786	Gls24 family general stress protein [Streptococcus pyogenes MGAS5005]	20	19931	4.93	M5005_Spy_0973	5	0.12
150	gi|71910512	purine nucleoside phosphorylase [Streptococcus pyogenes MGAS5005]	352	26003	5.15	M5005_Spy_0699	3	0.88
151	gi|71910603	succinate-semialdehyde dehydrogenase [Streptococcus pyogenes MGAS5005]	19	51743	4.92	M5005_Spy_0790	4	0.38
152	gi|71911197	glycyl-tRNA synthetase subunit beta [Streptococcus pyogenes MGAS5005]	181	74884	4.86	M5005_Spy_1384	5	0.64
153	gi|71911450	galactose-6-phosphate isomerase subunit LacB [Streptococcus pyogenes MGAS5005]	72	18881	5.35	M5005_Spy_1637	3	0.11
154	gi|71910440	glutathione reductase [Streptococcus pyogenes MGAS5005]	127	48885	5.75	M5005_Spy_0627	1	0.95
155	gi|71910748	phosphopantothenate--cysteine ligase [Streptococcus pyogenes MGAS5005]	51	25870	6.35	M5005_Spy_0935	2	0.47
156	gi|71911629	50S ribosomal protein L33 [Streptococcus pyogenes MGAS5005]	77	5909	10.35	M5005_Spy_1816	3	0.73
157	gi|71910784	Gls24 family general stress protein [Streptococcus pyogenes MGAS5005]	112	17312	4.65	M5005_Spy_0971	1	1.69
158	gi|71909953	NAD glycohydrolase [Streptococcus pyogenes MGAS5005]	27	51126	8.8	M5005_Spy_0139	4	0.39
159	gi|71910880	maltose/maltodextrin-binding protein [Streptococcus pyogenes MGAS5005]	184	45524	5.5	M5005_Spy_1067	2	1.82
160	gi|71910946	foldase protein PrsA [Streptococcus pyogenes MGAS5005]	353	38512	7.58	M5005_Spy_1133	4	0.06
161	gi|71910248	two-component response regulator [Streptococcus pyogenes MGAS5005]	280	27067	5.12	M5005_Spy_0435	2	1.55
162	gi|71910075	GTP-binding protein YqeH [Streptococcus pyogenes MGAS5005]	120	41650	6.39	M5005_Spy_0261	3	1.02
163	gi|71910589	GTP-binding protein LepA [Streptococcus pyogenes MGAS5005]	84	68148	5.15	M5005_Spy_0776	4	0.05
164	gi|71911193	alpha-glycerophosphate oxidase [Streptococcus pyogenes MGAS5005]	228	67598	4.98	M5005_Spy_1380	5	0.04
165	gi|71910945	alanyl-tRNA synthetase [Streptococcus pyogenes MGAS5005]	49	96471	4.92	M5005_Spy_1132	15	0.57
166	gi|71911368	30S ribosomal protein S6 [Streptococcus pyogenes MGAS5005]	900	11075	4.97	M5005_Spy_1555	6	0.85
167	gi|71910203	GTP-binding protein Era [Streptococcus pyogenes MGAS5005]	95	34066	6.11	M5005_Spy_0390	3	0.65
168	gi|71911393	hypothetical protein M5005_Spy_1580 [Streptococcus pyogenes MGAS5005]	39	10968	4.79	M5005_Spy_1580	16	1.03
169	gi|71909867	30S ribosomal protein S17 [Streptococcus pyogenes MGAS5005]	91	10083	10.05	M5005_Spy_0053	3	0.97
170	gi|71910413	RNA polymerase sigma factor RpoD [Streptococcus pyogenes MGAS5005]	66	42244	4.95	M5005_Spy_0600	1	0.82
171	gi|71911063	cell division protein [Streptococcus pyogenes MGAS5005]	252	49306	4.76	M5005_Spy_1250	4	0.02
172	gi|71910434	50S ribosomal protein L20 [Streptococcus pyogenes MGAS5005]	409	13614	10.82	M5005_Spy_0621	2	0.04
173	gi|71911308	MarR family transcriptional regulator [Streptococcus pyogenes MGAS5005]	223	16603	6.98	M5005_Spy_1495	2	0.03
174	gi|71911083	carbamate kinase [Streptococcus pyogenes MGAS5005]	139	33197	4.71	M5005_Spy_1270	8	0.01
175	gi|71911222	translation initiation factor IF-2 [Streptococcus pyogenes MGAS5005]	40	105472	9.19	M5005_Spy_1409	7	0.85
176	gi|71909834	putative glycerol-3-phosphate acyltransferase PlsX [Streptococcus pyogenes MGAS5005]	48	35475	8.49	M5005_Spy_0020	2	0.36
177	gi|71911165	cell division initiation protein [Streptococcus pyogenes MGAS5005]	86	12437	6.33	M5005_Spy_1352	1	0.53
178	gi|71911099	DNA polymerase [Streptococcus pyogenes MGAS5005]	56	39559	9.16	M5005_Spy_1286	11	0.14
179	gi|71911068	GTP-binding protein [Streptococcus pyogenes MGAS5005]	151	68644	4.88	M5005_Spy_1255	1	0.02
180	gi|71910086	ABC transporter ATP-binding protein [Streptococcus pyogenes MGAS5005]	75	38899	5.77	M5005_Spy_0272	1	0.73
181	gi|71911039	degV family protein [Streptococcus pyogenes MGAS5005]	54	30484	6.98	M5005_Spy_1226	1	0.72
182	gi|71911215	lactose phosphotransferase system repressor [Streptococcus pyogenes MGAS5005]	144	29151	5.08	M5005_Spy_1402	1	0.13
183	gi|71911372	thioredoxin [Streptococcus pyogenes MGAS5005]	280	11817	4.39	M5005_Spy_1559	1	0.44
184	gi|71911142	cysteine synthase [Streptococcus pyogenes MGAS5005]	119	33220	5.43	M5005_Spy_1329	1	0.19
185	gi|71909816	DNA polymerase III subunit beta [Streptococcus pyogenes MGAS5005]	22	41859	5.35	M5005_Spy_0002	1	0.15
186	gi|71910352	hypothetical protein M5005_Spy_0539 [Streptococcus pyogenes MGAS5005]	300	33566	5.94	M5005_Spy_0539	1	2.51
187	gi|71910609	50S ribosomal protein L7/L12 [Streptococcus pyogenes MGAS5005]	167	12249	4.49	M5005_Spy_0796	2	0.66
188	gi|71911679	chromosome partitioning protein [Streptococcus pyogenes MGAS5005]	57	30200	9.73	M5005_Spy_1866	1	0.55
189	gi|71910764	phosphate transport ATP-binding protein [Streptococcus pyogenes MGAS5005]	94	28063	7.71	M5005_Spy_0951	1	0.06
190	gi|71911459	30S ribosomal protein S9 [Streptococcus pyogenes MGAS5005]	58	14227	10.67	M5005_Spy_1646	2	0.63
191	gi|71911587	formate--tetrahydrofolate ligase [Streptococcus pyogenes MGAS5005]	172	59017	5.68	M5005_Spy_1774	2	0.22
192	gi|71909971	glycine betaine transport ATP-binding protein [Streptococcus pyogenes MGAS5005]	215	44299	5.52	M5005_Spy_0157	4	0.29
193	gi|71910141	uracil phosphoribosyltransferase [Streptococcus pyogenes MGAS5005]	93	22811	6.3	M5005_Spy_0327	4	0.07
194	gi|71911658	cobalt transporter ATP-binding subunit [Streptococcus pyogenes MGAS5005]	120	30844	8.59	M5005_Spy_1845	1	1.99
195	gi|71910452	pyrimidine regulatory protein PyrR [Streptococcus pyogenes MGAS5005]	56	19517	5.18	M5005_Spy_0639	2	0.63
196	gi|161936123	GTPase ObgE [Streptococcus pyogenes MGAS5005]	265	48115	4.99	M5005_Spy_1088	1	0.24
197	gi|71911175	transporter [Streptococcus pyogenes MGAS5005]	89	27654	8.62	M5005_Spy_1362	1	0.28
198	gi|71910362	hypothetical protein M5005_Spy_0549 [Streptococcus pyogenes MGAS5005]	122	10903	6.17	M5005_Spy_0549	1	1.06
199	gi|71911408	Zn-dependent hydrolase [Streptococcus pyogenes MGAS5005]	70	61059	5.67	M5005_Spy_1595	2	1.05
200	gi|71911304	acyl-carrier-protein S-malonyltransferase [Streptococcus pyogenes MGAS5005]	182	34193	6.02	M5005_Spy_1491	3	1.63
201	gi|71910043	surface exclusion protein [Streptococcus pyogenes MGAS5005]	86	94640	6.48	M5005_Spy_0229	5	0.17
202	gi|71911325	transcriptional repressor CodY [Streptococcus pyogenes MGAS5005]	155	28616	4.85	M5005_Spy_1512	2	0.43
203	gi|71910187	50S ribosomal protein L11[Streptococcus pyogenes MGAS5005]	117	14792	9.43	M5005_Spy_0374	2	0.52
204	gi|71909884	DNA-directed RNA polymerase subunit alpha [Streptococcus pyogenes MGAS5005]	265	34508	4.90	M5005_Spy_0070	4	0.03
205	gi|71910526	branched-chain amino acid aminotransferase [Streptococcus pyogenes MGAS5005]	234	37040	4.88	M5005_Spy_0713	2	0.83
206	gi|71910392	F0F1 ATP synthase subunit alpha [Streptococcus pyogenes MGAS5005]	133	54651	5	M5005_Spy_0579	4	0.07
207	gi|71910457	periplasmic component of efflux system [Streptococcus pyogenes MGAS5005]	1320	42133	5.93	M5005_Spy_0644	12	0.53
208	gi|71910933	phosphoenolpyruvate-protein phosphotransferase [Streptococcus pyogenes MGAS5005]	881	63096	4.59	M5005_Spy_1120	2	0.26
209	gi|71910237	catabolite control protein A [Streptococcus pyogenes MGAS5005]	60	36691	5.79	M5005_Spy_0424	2	1.53
210	gi|71910192	uridylate kinase [Streptococcus pyogenes MGAS5005]	79	13378	5.07	M5005_Spy_0379	1	0.39
211	gi|71911666	UTP--glucose-1-phosphate uridylyltransferase [Streptococcus pyogenes MGAS5005]	143	33629	6.41	M5005_Spy_1853	5	0.09
212	gi|71909827	cell division protein [Streptococcus pyogenes MGAS5005]	281	71749	6.2	M5005_Spy_0013	3	0.13
213	gi|71910101	GTP-binding protein EngA [Streptococcus pyogenes MGAS5005]	34	48771	5.13	M5005_Spy_0287	1	0.11
214	gi|71909978	parB-like nuclease [Streptococcus pyogenes MGAS5005]	85	20585	5.13	M5005_Spy_0164	2	0.27
215	gi|71910066	oligopeptide transport ATP-binding protein [Streptococcus pyogenes MGAS5005]	37	39679	5.6	M5005_Spy_0252	5	0.04
216	gi|71910805	ABC transporter ATP-binding protein [Streptococcus pyogenes MGAS5005]	135	26400	6.12	M5005_Spy_0992	5	0.07
217	gi|71910084	ABC transporter substrate-binding protein [Streptococcus pyogenes MGAS5005]	97	30604	6.85	M5005_Spy_0270	1	0.2
218	gi|71910549	dTDP-glucose 4,6-dehydratase [Streptococcus pyogenes MGAS5005]	262	38928	5.41	M5005_Spy_0736	1	0.12
219	gi|71911151	methionyl-tRNA formyltransferase [Streptococcus pyogenes MGAS5005]	80	33649	5.84	M5005_Spy_1338	2	0.53
220	gi|71910559	ABC transporter ATP-binding protein [Streptococcus pyogenes MGAS5005]	129	28010	5.99	M5005_Spy_0746	1	1.08
221	gi|71911072	non-specific DNA-binding protein/iron-binding ferritin-like antioxidant protein [Streptococcus pyogenes MGAS5005]	103	19335	5.19	M5005_Spy_1259	5	0.04
222	gi|71910763	phosphate transport system protein [Streptococcus pyogenes MGAS5005]	123	24997	4.91	M5005_Spy_0950	2	0.17
223	gi|71911204	degV family protein [Streptococcus pyogenes MGAS5005]	69	31082	7.62	M5005_Spy_1391	1	0.12
224	gi|71911665	UDP-glucose 6-dehydrogenase [Streptococcus pyogenes MGAS5005]	303	45655	6.93	M5005_Spy_1852	4	0.13
225	gi|71910381	streptolysin S export ATP-binding protein [Streptococcus pyogenes MGAS5005]	72	34209	6.56	M5005_Spy_0568	3	0.19
226	gi|71910200	uracil DNA glycosylase superfamily protein [Streptococcus pyogenes MGAS5005]	456	21931	6.08	M5005_Spy_0387	1	0.04
227	gi|71910437	3-dehydroquinate dehydratase [Streptococcus pyogenes MGAS5005]	564	26100	4.6	M5005_Spy_0624	2	0.52
228	gi|71911295	putative cytoplasmic protein [Streptococcus pyogenes MGAS5005]	91	13480	9.78	M5005_Spy_1482	3	0.43
229	gi|71909815	chromosomal replication initiation protein [Streptococcus pyogenes MGAS5005]	20	51633	5.56	M5005_Spy_0001	1	0.19
230	gi|71911582	peroxiredoxin reductase (NAD(P)H) [Streptococcus pyogenes MGAS5005]	280	54717	4.87	M5005_Spy_1769	2	0.39
231	gi|71910646	NAD-dependent malic enzyme [Streptococcus pyogenes MGAS5005]	103	40846	5.52	M5005_Spy_0833	1	0.23
232	gi|71910695	ribosomal biogenesis GTPase [Streptococcus pyogenes MGAS5005]	119	32185	9.35	M5005_Spy_0882	2	0.04
233	gi|71910397	UDP-N-acetylglucosamine 1-carboxyvinyltransferase [Streptococcus pyogenes MGAS5005]	226	39932	5.79	M5005_Spy_0584	1	0.07
234	gi|71910027	N-acetylneuraminate-binding protein [Streptococcus pyogenes MGAS5005]	28	48475	5.38	M5005_Spy_0213	2	0.27
235	gi|71911298	acetyl-CoA carboxylase subunit beta [Streptococcus pyogenes MGAS5005]	168	31805	7.7	M5005_Spy_1485	2	0.25
236	gi|71911425	trigger factor [Streptococcus pyogenes MGAS5005]	41	47067	4.39	M5005_Spy_1612	2	0.06
237	gi|71911363	excinuclease ABC subunit A [Streptococcus pyogenes MGAS5005]	60	105087	5.91	M5005_Spy_1550	2	0.07
238	gi|71910016	hypothetical protein M5005_Spy_0202 [Streptococcus pyogenes MGAS5005]	30	25490	5.53	M5005_Spy_0202	1	2.51
239	gi|71911651	tRNA uridine 5-carboxymethylaminomethyl modification enzyme GidA [Streptococcus pyogenes MGAS5005]	27	70214	6.61	M5005_Spy_1838	1	0.56
240	gi|71911644	30S ribosomal protein S4 [Streptococcus pyogenes MGAS5005]	73	23108	9.98	M5005_Spy_1831	8	0.36
241	gi|71910308	lysyl-tRNA synthetase [Streptococcus pyogenes MGAS5005]	210	56564	5.19	M5005_Spy_0495	2	0.52
242	gi|71911332	ATP-dependent DNA helicase [Streptococcus pyogenes MGAS5005]	21	75162	6.9	M5005_Spy_1519	2	0.42
243	gi|71911157	acetyl-CoA acetyltransferase [Streptococcus pyogenes MGAS5005]	41	41774	5.69	M5005_Spy_1344	2	0.37
244	gi|71910285	cell division protein [Streptococcus pyogenes MGAS5005]	56	56735	4.70	M5005_Spy_0472	1	0.64
245	gi|71910602	HAD superfamily hydrolase [Streptococcus pyogenes MGAS5005]	98	25736	4.93	M5005_Spy_0789	5	0.15
246	gi|71910041	CMP-binding factor [Streptococcus pyogenes MGAS5005]	105	35902	5.9	M5005_Spy_0227	1	0.53
247	gi|71910118	fused deoxyribonucleotide triphosphate pyrophosphatase/unknown domain-containing protein [Streptococcus pyogenes MGAS5005]	96	36270	5.44	M5005_Spy_0304	2	0.52
248	gi|71911486	prolyl-tRNA synthetase [Streptococcus pyogenes MGAS5005]	28	68774	5.05	M5005_Spy_1673	3	0.17
249	gi|71910198	67 kDa Myosin-crossreactive antigen [Streptococcus pyogenes MGAS5005]	223	68795	5.27	M5005_Spy_0385	1	0.56
250	gi|71911056	isoleucyl-tRNA synthetase [Streptococcus pyogenes MGAS5005]	226	105170	4.85	M5005_Spy_1243	3	0.15
251	gi|71911173	thioredoxin reductase [Streptococcus pyogenes MGAS5005]	25	33584	4.73	M5005_Spy_1360	1	0.63
252	gi|71910329	calcium-transporting ATPase [Streptococcus pyogenes MGAS5005]	26	97026	5.03	M5005_Spy_0516	2	0.52
253	gi|71909918	tRNA-dihydrouridine synthase [Streptococcus pyogenes MGAS5005]	20	35706	6.57	M5005_Spy_0104	1	0.42
254	gi|71910181	manganese-binding protein [Streptococcus pyogenes MGAS5005]	194	33865	5.83	M5005_Spy_0368	4	0.6
255	gi|71911042	arginine repressor [Streptococcus pyogenes MGAS5005]	35	17454	9.27	M5005_Spy_1229	1	0.83
256	gi|71910967	ATP-dependent RNA helicase [Streptococcus pyogenes MGAS5005]	36	60690	9.6	M5005_Spy_1154	2	0.1
257	gi|71909946	V-type ATP synthase subunit B [Streptococcus pyogenes MGAS5005]	129	52325	5.01	M5005_Spy_0132	3	1.56
258	gi|71911674	ABC transporter ATP-binding protein [Streptococcus pyogenes MGAS5005]	118	60753	4.77	M5005_Spy_1861	1	0.45
259	gi|71910538	ribonuclease Z [Streptococcus pyogenes MGAS5005]	27	34408	6.84	M5005_Spy_0725	1	1.08
260	gi|71911326	aminotransferase AlaT [Streptococcus pyogenes MGAS5005]	20	45479	5.26	M5005_Spy_1513	1	0.06
261	gi|71910755	nucleoside-binding protein [Streptococcus pyogenes MGAS5005]	53	36431	7.6	M5005_Spy_0942	2	1.54
262	gi|71909989	queuine tRNA-ribosyltransferase [Streptococcus pyogenes MGAS5005]	44	43054	6.42	M5005_Spy_0175	1	0.06
263	gi|71911440	ABC transporter permease protein [Streptococcus pyogenes MGAS5005]	54	71580	9.43	M5005_Spy_1627	2	0.14
264	gi|71910968	peptide chain release factor 3 [Streptococcus pyogenes MGAS5005]	52	58234	5.07	M5005_Spy_1155	5	0.11
265	gi|71910293	transcription accessory protein [Streptococcus pyogenes MGAS5005]	25	78850	5.53	M5005_Spy_0480	1	0.5
266	gi|71910099	replicative DNA helicase [Streptococcus pyogenes MGAS5005]	21	45085	9.23	M5005_Spy_0285	4	0.08
267	gi|71909950	adenylosuccinate synthetase [Streptococcus pyogenes MGAS5005]	287	47492	5.55	M5005_Spy_0136	3	0.07
268	gi|71911058	RNA binding protein [Streptococcus pyogenes MGAS5005]	56	30226	8.53	M5005_Spy_1245	1	0.42
269	gi|71911177	ATP-dependent RNA helicase [Streptococcus pyogenes MGAS5005]	77	50762	9.61	M5005_Spy_1364	1	0.19
270	gi|71910135	ferrichrome transport system permease protein [Streptococcus pyogenes MGAS5005]	18	32962	9.61	M5005_Spy_0321	2	0.08
271	gi|71911180	cell division protein [Streptococcus pyogenes MGAS5005]	23	12229	10.13	M5005_Spy_1367	2	1.2
272	gi|71910888	excinuclease ABC subunit B [Streptococcus pyogenes MGAS5005]	89	75654	4.9	M5005_Spy_1075	1	0.14
273	gi|71909881	50S ribosomal protein L36 [Streptococcus pyogenes MGAS5005]	19	4448	10.63	M5005_Spy_0067	1	0.26
274	gi|71910930	ATP-dependent RNA helicase [Streptococcus pyogenes MGAS5005]	27	40971	9.11	M5005_Spy_1117	5	0.42
275	gi|71909986	transposase [Streptococcus pyogenes MGAS5005]	55	20499	9.81	M5005_Spy_0172	1	0.19
276	gi|71911594	elongation factor Ts [Streptococcus pyogenes MGAS5005]	44	37204	4.86	M5005_Spy_1781	1	0.1
277	gi|71910582	putative cytoplasmic protein [Streptococcus pyogenes MGAS5005]	169	158427	8.98	M5005_Spy_0769	1	0.38
278	gi|71911101	putative cytoplasmic protein [Streptococcus pyogenes MGAS5005]	23	31760	6.13	M5005_Spy_1288	11	0.63
279	gi|71910170	hypothetical protein M5005_Spy_0357 [Streptococcus pyogenes MGAS5005]	48	23743	5.78	M5005_Spy_0357	1	0.36
280	gi|71910051	hypothetical protein M5005_Spy_0237 [Streptococcus pyogenes MGAS5005]	17	71065	8.99	M5005_Spy_0237	1	1.73
281	gi|71909818	translation-associated GTPase [Streptococcus pyogenes MGAS5005]	30	41069	4.75	M5005_Spy_0004	1	0.87
282	gi|71911116	shikimate 5-dehydrogenase [Streptococcus pyogenes MGAS5005]	30	31276	6.18	M5005_Spy_1303	4	0.06
283	gi|71910991	phage protein [Streptococcus pyogenes MGAS5005]	24	80694	5.56	M5005_Spy_1178	1	0.45
284	gi|71911092	putative cytoplasmic protein [Streptococcus pyogenes MGAS5005]	46	41541	5.46	M5005_Spy_1279	1	0.18

## Sheet: Sheet2
Locational categories of heme-binding proteins
Reference No	Description
cytoplasm
gi|71910321	elongation factor Tu [Streptococcus pyogenes MGAS5005]
gi|71910047	glyceraldehyde-3-phosphate dehydrogenase [Streptococcus pyogenes MGAS5005]
gi|71910802	6-phosphofructokinase [Streptococcus pyogenes MGAS5005]
gi|71910046	elongation factor G [Streptococcus pyogenes MGAS5005]
gi|71911292	PTS system, mannose-specific IIAB component [Streptococcus pyogenes MGAS5005]
gi|71911574	chaperonin GroEL [Streptococcus pyogenes MGAS5005]
gi|71911086	ornithine carbamoyltransferase [Streptococcus pyogenes MGAS5005]
gi|71911062	cell division protein FtsZ [Streptococcus pyogenes MGAS5005]
gi|71910008	glycerol-3-phosphate dehydrogenase [Streptococcus pyogenes MGAS5005]
gi|71910006	UTP--glucose-1-phosphate uridylyltransferase [Streptococcus pyogenes MGAS5005]
gi|71911311	molecular chaperone DnaK [Streptococcus pyogenes MGAS5005]
gi|71911211	galactose-6-phosphate isomerase subunit LacA [Streptococcus pyogenes MGAS5005]
gi|71910664	phosphotransacetylase [Streptococcus pyogenes MGAS5005]
gi|161936118	arginyl-tRNA synthetase [Streptococcus pyogenes MGAS5005]
gi|71910871	maltose/maltodextrin-binding protein [Streptococcus pyogenes MGAS5005]
gi|71911581	peroxiredoxin reductase (NAD(P)H) [Streptococcus pyogenes MGAS5005]
gi|71910605	NAD(P)H-dependent quinone reductase [Streptococcus pyogenes MGAS5005]
gi|71911420	fructose-bisphosphate aldolase [Streptococcus pyogenes MGAS5005]
gi|71910801	pyruvate kinase [Streptococcus pyogenes MGAS5005]
gi|71911302	3-oxoacyl-(acyl carrier protein) synthase II [Streptococcus pyogenes MGAS5005]
gi|71911303	3-ketoacyl-(acyl-carrier-protein) reductase [Streptococcus pyogenes MGAS5005]
gi|71911194	glycerol kinase [Streptococcus pyogenes MGAS5005]
gi|71910935	glutaredoxin [Streptococcus pyogenes MGAS5005]
gi|71911310	chaperone protein [Streptococcus pyogenes MGAS5005]
gi|71910507	ATP-dependent protease ATP-binding subunit [Streptococcus pyogenes MGAS5005]
gi|71910754	nucleoside transport ATP-binding protein [Streptococcus pyogenes MGAS5005]
gi|71910594	PTS system mannose/fructose family IIB subunit [Streptococcus pyogenes MGAS5005]
gi|71911320	aspartyl/glutamyl-tRNA amidotransferase subunit A [Streptococcus pyogenes MGAS5005]
gi|71910932	NADP-dependent glyceraldehyde-3-phosphate dehydrogenase [Streptococcus pyogenes MGAS5005]
gi|71911295	putative cytoplasmic protein [Streptococcus pyogenes MGAS5005]
gi|71911108	putative cytoplasmic protein [Streptococcus pyogenes MGAS5005]
gi|71911188	transketolase [Streptococcus pyogenes MGAS5005]
gi|71910175	glucosamine-1-phosphate acetyltransferase/UDP-N-acetylglucosamine pyrophosphorylase [Streptococcus pyogenes MGAS5005]
gi|71910799	D-fructose-6-phosphate amidotransferase [Streptococcus pyogenes MGAS5005]
gi|71911053	ATP-dependent Clp protease ATP-binding subunit [Streptococcus pyogenes MGAS5005]
gi|71911412	phosphoglycerate kinase [Streptococcus pyogenes MGAS5005]
gi|71910660	GTP pyrophosphokinase [Streptococcus pyogenes MGAS5005]
gi|71909970	putative L-ascorbate 6-phosphate lactonase [Streptococcus pyogenes MGAS5005]
gi|71910719	citrate lyase beta chain/citryl-CoA lyase subunit [Streptococcus pyogenes MGAS5005]
gi|71910751	phosphoglucomutase/phosphomannomutase [Streptococcus pyogenes MGAS5005]
gi|71910634	GTP cyclohydrolase I [Streptococcus pyogenes MGAS5005]
gi|71911400	uridine phosphorylase [Streptococcus pyogenes MGAS5005]
gi|71910504	ATP-dependent protease ATP-binding subunit [Streptococcus pyogenes MGAS5005]
gi|71911210	galactose-6-phosphate isomerase subunit LacB [Streptococcus pyogenes MGAS5005]
gi|71910075	GTP-binding protein YqeH [Streptococcus pyogenes MGAS5005]
gi|71910589	GTP-binding protein LepA [Streptococcus pyogenes MGAS5005]
gi|71911193	alpha-glycerophosphate oxidase [Streptococcus pyogenes MGAS5005]
gi|71910203	GTP-binding protein Era [Streptococcus pyogenes MGAS5005]
gi|71911068	GTP-binding protein [Streptococcus pyogenes MGAS5005]
gi|71911666	UTP--glucose-1-phosphate uridylyltransferase [Streptococcus pyogenes MGAS5005]
gi|71909827	cell division protein [Streptococcus pyogenes MGAS5005]
gi|71910101	GTP-binding protein EngA [Streptococcus pyogenes MGAS5005]
gi|71911582	peroxiredoxin reductase (NAD(P)H) [Streptococcus pyogenes MGAS5005]
gi|71911594	elongation factor Ts [Streptococcus pyogenes MGAS5005]
gi|71910582	putative cytoplasmic protein [Streptococcus pyogenes MGAS5005]
gi|71911101	putative cytoplasmic protein [Streptococcus pyogenes MGAS5005]
gi|71911092	putative cytoplasmic protein [Streptococcus pyogenes MGAS5005]
membrane
gi|71911495	multiple sugar transport ATP-binding protein [Streptococcus pyogenes MGAS5005]
gi|71910458	ABC transporter ATP-binding protein [Streptococcus pyogenes MGAS5005]
gi|71911195	hypothetical protein M5005_Spy_1382 [Streptococcus pyogenes MGAS5005]
gi|71910405	ABC transporter ATP-binding protein [Streptococcus pyogenes MGAS5005]
gi|71910049	amino acid transport ATP-binding protein [Streptococcus pyogenes MGAS5005]
gi|71910890	glutamine transport ATP-binding protein [Streptococcus pyogenes MGAS5005]
gi|71910086	ABC transporter ATP-binding protein [Streptococcus pyogenes MGAS5005]
gi|71911658	cobalt transporter ATP-binding subunit [Streptococcus pyogenes MGAS5005]
gi|71910805	ABC transporter ATP-binding protein [Streptococcus pyogenes MGAS5005]
gi|71910084	ABC transporter substrate-binding protein [Streptococcus pyogenes MGAS5005]
gi|71910559	ABC transporter ATP-binding protein [Streptococcus pyogenes MGAS5005]
gi|71911072	non-specific DNA-binding protein/iron-binding ferritin-like antioxidant protein [Streptococcus pyogenes MGAS5005]
gi|71910763	phosphate transport system protein [Streptococcus pyogenes MGAS5005]
gi|71910181	manganese-binding protein [Streptococcus pyogenes MGAS5005]
gi|71911674	ABC transporter ATP-binding protein [Streptococcus pyogenes MGAS5005]
gi|71911440	ABC transporter permease protein [Streptococcus pyogenes MGAS5005]
cell wall
gi|71910090	potassium uptake protein [Streptococcus pyogenes MGAS5005]
gi|71910764	phosphate transport ATP-binding protein [Streptococcus pyogenes MGAS5005]
gi|71910796	histidine transport ATP-binding protein [Streptococcus pyogenes MGAS5005]
gi|71910135	ferrichrome transport system permease protein [Streptococcus pyogenes MGAS5005]
gi|71910043	surface exclusion protein [Streptococcus pyogenes MGAS5005]
ribosome
gi|71910967	ATP-dependent RNA helicase [Streptococcus pyogenes MGAS5005]
gi|71911460	50S ribosomal protein L13 [Streptococcus pyogenes MGAS5005]
gi|71911593	30S ribosomal protein S2 [Streptococcus pyogenes MGAS5005]
gi|71909859	50S ribosomal protein L4 [Streptococcus pyogenes MGAS5005]
gi|71910446	50S ribosomal protein L21 [Streptococcus pyogenes MGAS5005]
gi|71910359	50S ribosomal protein L31 type B [Streptococcus pyogenes MGAS5005]
gi|71909870	50S ribosomal protein L5 [Streptococcus pyogenes MGAS5005]
gi|71910461	30S ribosomal protein S16 [Streptococcus pyogenes MGAS5005]
gi|71910364	50S ribosomal protein L19 [Streptococcus pyogenes MGAS5005]
gi|71909864	30S ribosomal protein S3 [Streptococcus pyogenes MGAS5005]
gi|71909873	50S ribosomal protein L6 [Streptococcus pyogenes MGAS5005]
gi|71909858	50S ribosomal protein L3 [Streptococcus pyogenes MGAS5005]
gi|71910188	50S ribosomal protein L1 [Streptococcus pyogenes MGAS5005]
gi|71909863	50S ribosomal protein L22 [Streptococcus pyogenes MGAS5005]
gi|71910045	30S ribosomal protein S7 [Streptococcus pyogenes MGAS5005]
gi|71909883	30S ribosomal protein S11 [Streptococcus pyogenes MGAS5005]
gi|71909885	50S ribosomal protein L17 [Streptococcus pyogenes MGAS5005]
gi|71911628	50S ribosomal protein L32 [Streptococcus pyogenes MGAS5005]
gi|71909868	50S ribosomal protein L14 [Streptococcus pyogenes MGAS5005]
gi|71909874	50S ribosomal protein L18 [Streptococcus pyogenes MGAS5005]
gi|71909872	30S ribosomal protein S8 [Streptococcus pyogenes MGAS5005]
gi|71910528	30S ribosomal protein S1 [Streptococcus pyogenes MGAS5005]
gi|71909860	50S ribosomal protein L23 [Streptococcus pyogenes MGAS5005]
gi|71909857	30S ribosomal protein S10 [Streptococcus pyogenes MGAS5005]
gi|71909861	50S ribosomal protein L2 [Streptococcus pyogenes MGAS5005]
gi|161936124	50S ribosomal protein L10 [Streptococcus pyogenes MGAS5005]
gi|71910448	50S ribosomal protein L27 [Streptococcus pyogenes MGAS5005]
gi|71910759	30S ribosomal protein S20 [Streptococcus pyogenes MGAS5005]
gi|71911649	50S ribosomal protein L9 [Streptococcus pyogenes MGAS5005]
gi|71909865	50S ribosomal protein L16 [Streptococcus pyogenes MGAS5005]
gi|71909876	50S ribosomal protein L30 [Streptococcus pyogenes MGAS5005]
gi|71909877	50S ribosomal protein L15 [Streptococcus pyogenes MGAS5005]
gi|71909869	50S ribosomal protein L24 [Streptococcus pyogenes MGAS5005]
gi|71909882	30S ribosomal protein S13 [Streptococcus pyogenes MGAS5005]
gi|71909862	30S ribosomal protein S19 [Streptococcus pyogenes MGAS5005]
gi|71911629	50S ribosomal protein L33 [Streptococcus pyogenes MGAS5005]
gi|71911368	30S ribosomal protein S6 [Streptococcus pyogenes MGAS5005]
gi|71909867	30S ribosomal protein S17 [Streptococcus pyogenes MGAS5005]
gi|71910434	50S ribosomal protein L20 [Streptococcus pyogenes MGAS5005]
gi|71910609	50S ribosomal protein L7/L12 [Streptococcus pyogenes MGAS5005]
gi|71911459	30S ribosomal protein S9 [Streptococcus pyogenes MGAS5005]
gi|71910063	oligopeptide-binding protein [Streptococcus pyogenes MGAS5005]
gi|71911099	DNA polymerase [Streptococcus pyogenes MGAS5005]
gi|71911138	ribosome-associated factor Y [Streptococcus pyogenes MGAS5005]
gi|71911153	DNA-directed RNA polymerase subunit omega [Streptococcus pyogenes MGAS5005]
gi|71910067	oligopeptide transport ATP-binding protein [Streptococcus pyogenes MGAS5005]
gi|71910187	50S ribosomal protein L11 [Streptococcus pyogenes MGAS5005]
gi|71910413	RNA polymerase sigma factor RpoD [Streptococcus pyogenes MGAS5005]
gi|71910945	alanyl-tRNA synthetase [Streptococcus pyogenes MGAS5005]
gi|71911197	glycyl-tRNA synthetase subunit beta [Streptococcus pyogenes MGAS5005]
gi|71911679	chromosome partitioning protein [Streptococcus pyogenes MGAS5005]
gi|71910066	oligopeptide transport ATP-binding protein [Streptococcus pyogenes MGAS5005]
gi|71909884	DNA-directed RNA polymerase subunit alpha [Streptococcus pyogenes MGAS5005]
gi|71910308	lysyl-tRNA synthetase [Streptococcus pyogenes MGAS5005]
gi|71911058	RNA binding protein [Streptococcus pyogenes MGAS5005]
gi|71911177	ATP-dependent RNA helicase [Streptococcus pyogenes MGAS5005]
gi|71910309	ATP-dependent DNA helicase [Streptococcus pyogenes MGAS5005]
gi|71909875	30S ribosomal protein S5 [Streptococcus pyogenes MGAS5005]
other
gi|71910691	hypothetical protein M5005_Spy_0878 [Streptococcus pyogenes MGAS5005]
gi|71911036	DNA-binding protein HU [Streptococcus pyogenes MGAS5005]
gi|71910369	phosphopyruvate hydratase [Streptococcus pyogenes MGAS5005]
gi|71910394	F0F1 ATP synthase subunit beta [Streptococcus pyogenes MGAS5005]
gi|71909897	DNA-directed RNA polymerase subunit beta [Streptococcus pyogenes MGAS5005]
gi|71911612	recombinase A [Streptococcus pyogenes MGAS5005]
gi|71911654	L-serine dehydratase [Streptococcus pyogenes MGAS5005]
gi|71910655	redox-sensing transcriptional repressor Rex [Streptococcus pyogenes MGAS5005]
gi|71911297	acetyl-CoA carboxylase subunit alpha [Streptococcus pyogenes MGAS5005]
gi|71910958	superoxide dismutase [Streptococcus pyogenes MGAS5005]
gi|71910322	triosephosphate isomerase [Streptococcus pyogenes MGAS5005]
gi|71909832	ribose-phosphate pyrophosphokinase [Streptococcus pyogenes MGAS5005]
gi|71911347	preprotein translocase subunit SecA [Streptococcus pyogenes MGAS5005]
gi|71910042	purine operon repressor [Streptococcus pyogenes MGAS5005]
gi|71910511	purine nucleoside phosphorylase [Streptococcus pyogenes MGAS5005]
gi|71910142	ATP-dependent Clp protease proteolytic subunit [Streptococcus pyogenes MGAS5005]
gi|71911450	galactose-6-phosphate isomerase subunit LacB [Streptococcus pyogenes MGAS5005]
gi|71910440	glutathione reductase [Streptococcus pyogenes MGAS5005]
gi|71910748	phosphopantothenate--cysteine ligase [Streptococcus pyogenes MGAS5005]
gi|71910784	Gls24 family general stress protein [Streptococcus pyogenes MGAS5005]
gi|71909953	NAD glycohydrolase [Streptococcus pyogenes MGAS5005]
gi|71910880	maltose/maltodextrin-binding protein [Streptococcus pyogenes MGAS5005]
gi|71910946	foldase protein PrsA [Streptococcus pyogenes MGAS5005]
gi|71910248	two-component response regulator [Streptococcus pyogenes MGAS5005]
gi|71911063	cell division protein [Streptococcus pyogenes MGAS5005]
gi|71911408	Zn-dependent hydrolase [Streptococcus pyogenes MGAS5005]
gi|71911325	transcriptional repressor CodY [Streptococcus pyogenes MGAS5005]
gi|71910549	dTDP-glucose 4,6-dehydratase [Streptococcus pyogenes MGAS5005]
gi|71911665	UDP-glucose 6-dehydrogenase [Streptococcus pyogenes MGAS5005]
gi|71910381	streptolysin S export ATP-binding protein [Streptococcus pyogenes MGAS5005]
gi|71910200	uracil DNA glycosylase superfamily protein [Streptococcus pyogenes MGAS5005]
gi|71910437	3-dehydroquinate dehydratase [Streptococcus pyogenes MGAS5005]
gi|71909815	chromosomal replication initiation protein [Streptococcus pyogenes MGAS5005]
gi|71910646	NAD-dependent malic enzyme [Streptococcus pyogenes MGAS5005]
gi|71911157	acetyl-CoA acetyltransferase [Streptococcus pyogenes MGAS5005]
gi|71909918	tRNA-dihydrouridine synthase [Streptococcus pyogenes MGAS5005]
gi|71909946	V-type ATP synthase subunit B [Streptococcus pyogenes MGAS5005]
gi|71910930	ATP-dependent RNA helicase [Streptococcus pyogenes MGAS5005]
gi|71909986	transposase [Streptococcus pyogenes MGAS5005]
gi|71909818	translation-associated GTPase [Streptococcus pyogenes MGAS5005]
gi|71911116	shikimate 5-dehydrogenase [Streptococcus pyogenes MGAS5005]
unknown
gi|71911305	enoyl-[acyl-carrier protein] reductase (NADH) [Streptococcus pyogenes MGAS5005]
gi|71911088	arginine deiminase [Streptococcus pyogenes MGAS5005]
gi|71910564	pyruvate dehydrogenase E1 component alpha subunit [Streptococcus pyogenes MGAS5005]
gi|71910568	dihydrolipoamide dehydrogenase [Streptococcus pyogenes MGAS5005]
gi|71910432	translation initiation factor IF-3 [Streptococcus pyogenes MGAS5005]
gi|71910565	pyruvate dehydrogenase E1 component beta subunit [Streptococcus pyogenes MGAS5005]
gi|71911410	MerR family transcriptional regulator [Streptococcus pyogenes MGAS5005]
gi|71909898	DNA-directed RNA polymerase subunit beta' [Streptococcus pyogenes MGAS5005]
gi|71910977	phosphoglyceromutase [Streptococcus pyogenes MGAS5005]
gi|71911670	inositol-5-monophosphate dehydrogenase [Streptococcus pyogenes MGAS5005]
gi|71910300	hypothetical protein M5005_Spy_0487 [Streptococcus pyogenes MGAS5005]
gi|71910154	L-lactate oxidase [Streptococcus pyogenes MGAS5005]
gi|71910728	signal recognition particle, subunit FFH/SRP54 [Streptococcus pyogenes MGAS5005]
gi|71910566	branched-chain alpha-keto acid dehydrogenase subunit E2 [Streptococcus pyogenes MGAS5005]
gi|71911415	kinase related to hydroxyacetone kinase [Streptococcus pyogenes MGAS5005]
gi|71911451	galactose-6-phosphate isomerase subunit LacA [Streptococcus pyogenes MGAS5005]
gi|71910023	jag protein [Streptococcus pyogenes MGAS5005]
gi|71911382	formate acetyltransferase [Streptococcus pyogenes MGAS5005]
gi|71910560	Zn-dependent hydrolase [Streptococcus pyogenes MGAS5005]
gi|71911279	phage protein [Streptococcus pyogenes phage 5005.3]
gi|71910534	hypothetical protein M5005_Spy_0721 [Streptococcus pyogenes MGAS5005]
gi|71910648	class B acid phosphatase [Streptococcus pyogenes MGAS5005]
gi|71910395	F0F1 ATP synthase subunit epsilon [Streptococcus pyogenes MGAS5005]
gi|71911034	phage protein [Streptococcus pyogenes phage 5005.2]
gi|71911189	putative translaldolase [Streptococcus pyogenes MGAS5005]
gi|71910804	GntR family transcriptional regulator [Streptococcus pyogenes MGAS5005]
gi|71911286	hypothetical protein M5005_Spy_1473 [Streptococcus pyogenes MGAS5005]
gi|71910120	CBS domain-containing protein [Streptococcus pyogenes MGAS5005]
gi|71910738	anaerobic ribonucleoside-triphosphate reductase [Streptococcus pyogenes MGAS5005]
gi|71909955	streptolysin O [Streptococcus pyogenes MGAS5005]
gi|71911327	universal stress protein [Streptococcus pyogenes MGAS5005]
gi|71911576	negative regulator of genetic competence [Streptococcus pyogenes MGAS5005]
gi|71911359	Gls24 family general stress protein [Streptococcus pyogenes MGAS5005]
gi|71911473	polynucleotide phosphorylase/polyadenylase [Streptococcus pyogenes MGAS5005]
gi|71911300	(3R)-hydroxymyristoyl-ACP dehydratase [Streptococcus pyogenes MGAS5005]
gi|71909908	acetate kinase [Streptococcus pyogenes MGAS5005]
gi|71911299	acetyl-CoA carboxylase biotin carboxylase subunit [Streptococcus pyogenes MGAS5005]
gi|71910878	alpha-amylase [Streptococcus pyogenes MGAS5005]
gi|71910921	S-adenosylmethionine synthetase [Streptococcus pyogenes MGAS5005]
gi|71910384	endonuclease/exonuclease/phosphatase family protein [Streptococcus pyogenes MGAS5005]
gi|71910658	ribose-phosphate pyrophosphokinase [Streptococcus pyogenes MGAS5005]
gi|71910155	lactocepin [Streptococcus pyogenes MGAS5005]
gi|71910786	Gls24 family general stress protein [Streptococcus pyogenes MGAS5005]
gi|71910512	purine nucleoside phosphorylase [Streptococcus pyogenes MGAS5005]
gi|71910603	succinate-semialdehyde dehydrogenase [Streptococcus pyogenes MGAS5005]
gi|71911393	hypothetical protein M5005_Spy_1580 [Streptococcus pyogenes MGAS5005]
gi|71911308	MarR family transcriptional regulator [Streptococcus pyogenes MGAS5005]
gi|71911083	carbamate kinase [Streptococcus pyogenes MGAS5005]
gi|71911222	translation initiation factor IF-2 [Streptococcus pyogenes MGAS5005]
gi|71909834	putative glycerol-3-phosphate acyltransferase PlsX [Streptococcus pyogenes MGAS5005]
gi|71911165	cell division initiation protein [Streptococcus pyogenes MGAS5005]
gi|71911039	degV family protein [Streptococcus pyogenes MGAS5005]
gi|71911215	lactose phosphotransferase system repressor [Streptococcus pyogenes MGAS5005]
gi|71911372	thioredoxin [Streptococcus pyogenes MGAS5005]
gi|71911142	cysteine synthase [Streptococcus pyogenes MGAS5005]
gi|71909816	DNA polymerase III subunit beta [Streptococcus pyogenes MGAS5005]
gi|71910352	hypothetical protein M5005_Spy_0539 [Streptococcus pyogenes MGAS5005]
gi|71911587	formate--tetrahydrofolate ligase [Streptococcus pyogenes MGAS5005]
gi|71909971	glycine betaine transport ATP-binding protein [Streptococcus pyogenes MGAS5005]
gi|71910141	uracil phosphoribosyltransferase [Streptococcus pyogenes MGAS5005]
gi|71910452	pyrimidine regulatory protein PyrR [Streptococcus pyogenes MGAS5005]
gi|161936123	GTPase ObgE [Streptococcus pyogenes MGAS5005]
gi|71911175	transporter [Streptococcus pyogenes MGAS5005]
gi|71910362	hypothetical protein M5005_Spy_0549 [Streptococcus pyogenes MGAS5005]
gi|71911304	acyl-carrier-protein S-malonyltransferase [Streptococcus pyogenes MGAS5005]
gi|71910526	branched-chain amino acid aminotransferase [Streptococcus pyogenes MGAS5005]
gi|71910392	F0F1 ATP synthase subunit alpha [Streptococcus pyogenes MGAS5005]
gi|71910457	periplasmic component of efflux system [Streptococcus pyogenes MGAS5005]
gi|71910933	phosphoenolpyruvate-protein phosphotransferase [Streptococcus pyogenes MGAS5005]
gi|71910237	catabolite control protein A [Streptococcus pyogenes MGAS5005]
gi|71910192	uridylate kinase [Streptococcus pyogenes MGAS5005]
gi|71909978	parB-like nuclease [Streptococcus pyogenes MGAS5005]
gi|71911151	methionyl-tRNA formyltransferase [Streptococcus pyogenes MGAS5005]
gi|71910397	degV family protein [Streptococcus pyogenes MGAS5005]
gi|71910027	UDP-N-acetylglucosamine 1-carboxyvinyltransferase [Streptococcus pyogenes MGAS5005]
gi|71911298	N-acetylneuraminate-binding protein [Streptococcus pyogenes MGAS5005]
gi|71911425	acetyl-CoA carboxylase subunit beta [Streptococcus pyogenes MGAS5005]
gi|71911363	trigger factor [Streptococcus pyogenes MGAS5005]
gi|71910016	excinuclease ABC subunit A [Streptococcus pyogenes MGAS5005]
gi|71910285	hypothetical protein M5005_Spy_0202 [Streptococcus pyogenes MGAS5005]
gi|71910602	cell division protein [Streptococcus pyogenes MGAS5005]
gi|71910041	HAD superfamily hydrolase [Streptococcus pyogenes MGAS5005]
gi|71910118	CMP-binding factor [Streptococcus pyogenes MGAS5005]
gi|71911486	fused deoxyribonucleotide triphosphate pyrophosphatase/unknown domain-containing protein [Streptococcus pyogenes MGAS5005]
gi|71910198	prolyl-tRNA synthetase [Streptococcus pyogenes MGAS5005]
gi|71911056	67 kDa Myosin-crossreactive antigen [Streptococcus pyogenes MGAS5005]
gi|71911173	isoleucyl-tRNA synthetase [Streptococcus pyogenes MGAS5005]
gi|71910329	thioredoxin reductase [Streptococcus pyogenes MGAS5005]
gi|71911042	calcium-transporting ATPase [Streptococcus pyogenes MGAS5005]
gi|71910538	arginine repressor [Streptococcus pyogenes MGAS5005]
gi|71911326	ribonuclease Z [Streptococcus pyogenes MGAS5005]
gi|71910755	aminotransferase AlaT [Streptococcus pyogenes MGAS5005]
gi|71909989	nucleoside-binding protein [Streptococcus pyogenes MGAS5005]
gi|71910968	queuine tRNA-ribosyltransferase [Streptococcus pyogenes MGAS5005]
gi|71910293	peptide chain release factor 3 [Streptococcus pyogenes MGAS5005]
gi|71910099	transcription accessory protein [Streptococcus pyogenes MGAS5005]
gi|71909950	replicative DNA helicase [Streptococcus pyogenes MGAS5005]
gi|71911180	adenylosuccinate synthetase [Streptococcus pyogenes MGAS5005]
gi|71910888	cell division protein [Streptococcus pyogenes MGAS5005]
gi|71910170	excinuclease ABC subunit B [Streptococcus pyogenes MGAS5005]
gi|71910051	hypothetical protein M5005_Spy_0357 [Streptococcus pyogenes MGAS5005]
gi|71910991	hypothetical protein M5005_Spy_0237 [Streptococcus pyogenes MGAS5005]
gi|71911057	cell division initiation protein [Streptococcus pyogenes MGAS5005]
