# Supplementary material for: Proteomic analysis of putative heme-binding proteins in Streptococcus pyogenes
Source: Royal Society of Chemistry journal article supplement (doi:10.1039/c4mt00027g), 2014-04-09
Supplement: c4mt00027g2.xlsx [file c4mt00027g2.xlsx]

## Sheet: Sheet1
Heme-regulatory proteins of S. pyogenes MGAS5005
No	Reference No	Decription	Molcular_weight (Daltons)	Protein Score	Protein PI	Fold(-heme/+heme)	Locus-tag	Number of peptides
1	gi|71910548	dTDP-4-dehydrorhamnose 3,5-epimerase	22480.4	228	5.07	-1.5	M5005_Spy_0735	12
2	gi|71911644	30S ribosomal protein S4	23108.3	75	9.98	-1.7	M5005_Spy_1831	12
3	gi|71911189	putative translaldolase	23314.2	300	5.01	-1.6	M5005_Spy_1376	9
4	gi|71910541	adenine phosphoribosyltransferase	18845.7	56	5.2	1.6	M5005_Spy_0728	5
5	gi|71910786	Gls24 family general stress protein	19931.4	161	4.93	-1.7	M5005_Spy_0973	5
6	gi|71909826	hypoxanthine-guanine phosphoribosyltransferase	20768.8	369	5.49	-2.2	M5005_Spy_0012	4
7	gi|71911188	transketolase	71308.3	260	4.88	-1.5	M5005_Spy_1375	6
8	gi|71911400	uridine phosphorylase	28095.9	364	5.11	2	M5005_Spy_1587	12
9	gi|71909971	glycine betaine transport ATP-binding protein	44299.3	22	5.52	-2.8	M5005_Spy_0157	4
10	gi|71910034	sec-independent protein translocase protein	30734.6	57	5.48	1.9	M5005_Spy_0220	3
11	gi|71910283	HAD superfamily hydrolase	29297.8	122	4.81	-1.8	M5005_Spy_0470	7
12	gi|71910230	pyrrolidone-carboxylate peptidase	23344.8	86	5.64	1.7	M5005_Spy_0417	4
13	gi|71911360	elongation factor P	20454.4	195	4.85	-2.3	M5005_Spy_1547	5
14	gi|71910799	D-fructose-6-phosphate amidotransferase	65523.6	50	5.1	1.5	M5005_Spy_0986	4
15	gi|71911451	galactose-6-phosphate isomerase subunit LacA	15473.9	235	5.22	-2.1	M5005_Spy_1638	8
16	gi|71910719	citrate lyase beta chain/citryl-CoA lyase subunit	31056.2	56	5.08	-1.6	M5005_Spy_0906	3
17	gi|71911359	Gls24 family general stress protein	14127.2	93	4.76	-1.8	M5005_Spy_1546	2
18	gi|71911017	recT protein	34266.1	25	4.67	-1.7	M5005_Spy_1204	4
19	gi|71910364	50S ribosomal protein L19	13137.3	85	11.1	-10	M5005_Spy_0551	7
20	gi|71911460	50S ribosomal protein L13	16120.6	55	9.91	-1.5	M5005_Spy_1647	4
21	gi|71910300	hypothetical protein M5005_Spy_0487	16080.1	31	4.78	-1.9	M5005_Spy_0487	4
22	gi|71910637	2-amino-4-hydroxy-6-hydroxymethyldihydropteridine pyrophosphokinase	18868.7	72	4.81	1.7	M5005_Spy_0824	5
23	gi|71910154	L-lactate oxidase	42553.4	191	5.26	2.2	M5005_Spy_0340	9
24	gi|71910649	acid phosphatase/phosphotransferase	15748.2	28	9.5	-2.1	M5005_Spy_0836	4
25	gi|71911450	galactose-6-phosphate isomerase subunit LacB	19052.5	234	5.35	-2.2	M5005_Spy_1637	8
26	gi|71910784	Gls24 family general stress protein	17311.9	570	4.65	-6.6	M5005_Spy_0971	10
27	gi|71910594	PTS system mannose/fructose family IIB subunit	17979.7	220	6.13	-1.8	M5005_Spy_0781	6
28	gi|71910258	S-adenosylmethionine synthetase	46027.3	34	5.72	2.3	M5005_Spy_0445	4
29	gi|71911372	thioredoxin	11817	60	4.39	2.3	M5005_Spy_1559	4
30	gi|71911546	hypothetical protein M5005_Spy_1733	12022.9	25	9.59	-1.8	M5005_Spy_1733	3
31	gi|71911102	hypothetical protein M5005_Spy_1289	73840.3	24	5.94	-1.7	M5005_Spy_1289	2
32	gi|71910161	ribonucleotide reductase stimulatory protein	18206.6	48	10.11	5.2	M5005_Spy_1733	5
33	gi|71911585	glutamate formiminotransferase	33569	147	5.42	2.8	M5005_Spy_1772	7
34	gi|71911274	phage protein	8059.4	28	9.77	1.6	M5005_Spy_1461	3
35	gi|71910732	bifunctional GMP synthase/glutamine amidotransferase protein	57693.6	117	4.91	-4.9	M5005_Spy_0919	11
36	gi|71911574	chaperonin GroEL	57060	422	4.75	1.5	M5005_Spy_1761	19
37	gi|71910060	ABC transporter-associated protein	52863.1	63	4.91	1.8	M5005_Spy_0246	5
38	gi|71910771	hypothetical protein M5005_Spy_0958	10651.5	24	9.2	1.9	M5005_Spy_0958	3
39	gi|71911062	cell division protein FtsZ	46403.4	326	4.53	10.9	M5005_Spy_1249	18
40	gi|71910486	tRNA CCA-pyrophosphorylase	46261.9	33	5.55	11	M5005_Spy_0673	6
41	gi|71911582	peroxiredoxin reductase (NAD(P)H)	55002.3	30	4.87	2.4	M5005_Spy_1769	6
42	gi|71910751	phosphoglucomutase/phosphomannomutase	63293.1	94	4.78	2.5	M5005_Spy_0938	8
43	gi|71910046	elongation factor G	76537.6	120	4.83	1.8	M5005_Spy_0232	16
44	gi|71909916	single-strand DNA-binding protein	14835.8	23	7.85	2.3	M5005_Spy_0102	3
45	gi|71910066	oligopeptide transport ATP-binding protein	39792.8	31	5.6	5.5	M5005_Spy_0252	5
46	gi|71910564	pyruvate dehydrogenase E1 component alpha subunit	35422.1	232	5.12	1.7	M5005_Spy_0751	6
47	gi|71911193	alpha-glycerophosphate oxidase	67598.4	296	4.98	-1.5	M5005_Spy_1380	21
48	gi|71910968	peptide chain release factor 3	58234.2	52	5.07	1.6	M5005_Spy_1155	9
49	gi|71909945	V-type ATP synthase subunit A	65097.3	311	5.13	-3.5	M5005_Spy_0131	20
50	gi|71911652	phosphohydrolase	12254.1	21	4.81	-6.5	M5005_Spy_1839	2
51	gi|71911415	kinase related to hydroxyacetone kinase	59159.6	81	4.42	-1.8	M5005_Spy_1602	6
52	gi|71909818	translation-associated GTPase	41069.2	30	4.75	-2.7	M5005_Spy_0004	4
53	gi|71910009	MarR family transcriptional regulator	17389.4	28	9.08	-1.6	M5005_Spy_0195	4
54	gi|71910565	pyruvate dehydrogenase E1 component beta subunit	35944.6	127	4.86	-1.7	M5005_Spy_0752	7
55	gi|71909879	adenylate kinase	23742.2	29	4.83	-1.8	M5005_Spy_0065	4
56	gi|71910344	cell division ATP-binding protein	26144	28	9.52	7.5	M5005_Spy_0531	5
57	gi|71911652	phosphohydrolase	12254.1	28	4.81	2.7	M5005_Spy_1839	2
58	gi|71911070	glucokinase/xylose repressor	33547.1	34	4.69	1.9	M5005_Spy_1257	3
59	gi|71911652	phosphohydrolase	12254.1	21	4.81	2.8	M5005_Spy_1839	2
60	gi|71911083	carbamate kinase	33254.3	44	4.71	1.6	M5005_Spy_1270	5
61	gi|71911142	cysteine synthase	33219.6	83	5.43	-3.1	M5005_Spy_1329	5
62	gi|71911632	hypothetical protein M5005_Spy_1819	35660.2	31	5.46	1.9	M5005_Spy_1819	5
63	gi|71910408	ATP-dependent nuclease subunit A	140790	29	6.18	2.6	M5005_Spy_0595	8
64	gi|71910397	UDP-N-acetylglucosamine 1-carboxyvinyltransferase	39989.4	89	5.79	2.5	M5005_Spy_0584	5
65	gi|71911311	molecular chaperone DnaK	64880.2	65	4.62	3.7	M5005_Spy_1498	5
66	gi|71910047	glyceraldehyde-3-phosphate dehydrogenase	36034.4	104	5.34	-1.8	M5005_Spy_0233	15
67	gi|71911219	copAB ATPase metal-fist type repressor	16989.8	26	8.26	1.9	M5005_Spy_1406	3
68	gi|71911495	multiple sugar transport ATP-binding protein	42051.5	182	5.73	-2.2	M5005_Spy_1682	10

## Sheet: Sheet3
Locational categories of heme-regulatory proteins
Reference No	Description
cytoplasm
gi|71910541	adenine phosphoribosyltransferase [Streptococcus pyogenes MGAS5005]
gi|71909826	hypoxanthine-guanine phosphoribosyltransferase [Streptococcus pyogenes MGAS5005]
gi|71910230	pyrrolidone-carboxylate peptidase [Streptococcus pyogenes MGAS5005]
gi|71911360	elongation factor P [Streptococcus pyogenes MGAS5005]
gi|71910594	PTS system mannose/fructose family IIB subunit [Streptococcus pyogenes MGAS5005]
gi|71911574	chaperonin GroEL [Streptococcus pyogenes MGAS5005]
gi|71910046	elongation factor G [Streptococcus pyogenes MGAS5005]
gi|71910046	elongation factor G [Streptococcus pyogenes MGAS5005]
gi|71911193	alpha-glycerophosphate oxidase [Streptococcus pyogenes MGAS5005]
gi|71910968	peptide chain release factor 3 [Streptococcus pyogenes MGAS5005]
gi|71909879	adenylate kinase [Streptococcus pyogenes MGAS5005]
gi|71911070	glucokinase/xylose repressor [Streptococcus pyogenes MGAS5005]
gi|71910397	UDP-N-acetylglucosamine 1-carboxyvinyltransferase [Streptococcus pyogenes MGAS5005]
gi|71910047	glyceraldehyde-3-phosphate dehydrogenase [Streptococcus pyogenes MGAS5005]
gi|71911062	cell division protein FtsZ [Streptococcus pyogenes MGAS5005]
membrane
gi|71909971	glycine betaine transport ATP-binding protein [Streptococcus pyogenes MGAS5005]
gi|71910649	acid phosphatase/phosphotransferase [Streptococcus pyogenes MGAS5005]
gi|71911062	cell division protein FtsZ [Streptococcus pyogenes MGAS5005]
gi|71910066	oligopeptide transport ATP-binding protein [Streptococcus pyogenes MGAS5005]
ribosome
gi|71910364	50S ribosomal protein L19 [Streptococcus pyogenes MGAS5005]
gi|71911460	50S ribosomal protein L13 [Streptococcus pyogenes MGAS5005]
gi|71911460	50S ribosomal protein L13 [Streptococcus pyogenes MGAS5005]
other
gi|71911644	30S ribosomal protein S4 [Streptococcus pyogenes MGAS5005]
gi|71909945	V-type ATP synthase subunit A [Streptococcus pyogenes MGAS5005]
gi|71910009	MarR family transcriptional regulator [Streptococcus pyogenes MGAS5005]
unknown
gi|71910548	dTDP-4-dehydrorhamnose 3,5-epimerase [Streptococcus pyogenes MGAS5005]
gi|71911189	putative translaldolase [Streptococcus pyogenes MGAS5005]
gi|71910786	Gls24 family general stress protein [Streptococcus pyogenes MGAS5005]
gi|71911189	putative translaldolase [Streptococcus pyogenes MGAS5005]
gi|71911400	uridine phosphorylase [Streptococcus pyogenes MGAS5005]
gi|71910034	sec-independent protein translocase protein [Streptococcus pyogenes MGAS5005]
gi|71910283	HAD superfamily hydrolase [Streptococcus pyogenes MGAS5005]
gi|71910786	Gls24 family general stress protein [Streptococcus pyogenes MGAS5005]
gi|71911451	galactose-6-phosphate isomerase subunit LacA [Streptococcus pyogenes MGAS5005]
gi|71910786	Gls24 family general stress protein [Streptococcus pyogenes MGAS5005]
gi|71911359	Gls24 family general stress protein [Streptococcus pyogenes MGAS5005]
gi|71911017	recT protein [Streptococcus pyogenes MGAS5005]
gi|71910300	hypothetical protein M5005_Spy_0487 [Streptococcus pyogenes MGAS5005]
gi|71910637	2-amino-4-hydroxy-6-hydroxymethyldihydropteridine pyrophosphokinase [Streptococcus pyogenes
gi|71911450	galactose-6-phosphate isomerase subunit LacB [Streptococcus pyogenes MGAS5005]
gi|71910784	Gls24 family general stress protein [Streptococcus pyogenes MGAS5005]
gi|71910258	S-adenosylmethionine synthetase [Streptococcus pyogenes MGAS5005]
gi|71911372	thioredoxin [Streptococcus pyogenes MGAS5005]
gi|71911546	hypothetical protein M5005_Spy_1733 [Streptococcus pyogenes MGAS5005]
gi|71911102	hypothetical protein M5005_Spy_1289 [Streptococcus pyogenes MGAS5005]
gi|71910161	ribonucleotide reductase stimulatory protein [Streptococcus pyogenes MGAS5005]
gi|71911585	glutamate formiminotransferase [Streptococcus pyogenes MGAS5005]
gi|71911274	phage protein [Streptococcus pyogenes MGAS5005]
gi|71910732	bifunctional GMP synthase/glutamine amidotransferase protein [Streptococcus pyogenes MGAS5005]
gi|71910060	ABC transporter-associated protein [Streptococcus pyogenes MGAS5005]
gi|71910771	hypothetical protein M5005_Spy_0958 [Streptococcus pyogenes MGAS5005]
gi|71910486	tRNA CCA-pyrophosphorylase [Streptococcus pyogenes MGAS5005]
gi|71911582	peroxiredoxin reductase (NAD(P)H) [Streptococcus pyogenes MGAS5005]
gi|71910751	phosphoglucomutase/phosphomannomutase [Streptococcus pyogenes MGAS5005]
gi|71909916	single-strand DNA-binding protein [ Streptococcus pyogenes MGAS5005]
gi|71911652	phosphohydrolase [Streptococcus pyogenes MGAS5005]
gi|71911415	kinase related to hydroxyacetone kinase [Streptococcus pyogenes MGAS5005]
gi|71909818	translation-associated GTPase [Streptococcus pyogenes MGAS5005]
gi|71910565	pyruvate dehydrogenase E1 component beta subunit [Streptococcus pyogenes MGAS5005]
gi|71911652	phosphohydrolase [Streptococcus pyogenes MGAS5005]
gi|71911652	phosphohydrolase [Streptococcus pyogenes MGAS5005]
gi|71911083	carbamate kinase [Streptococcus pyogenes MGAS5005]
gi|71911142	cysteine synthase [Streptococcus pyogenes MGAS5005]
gi|71911632	hypothetical protein M5005_Spy_1819 [Streptococcus pyogenes MGAS5005]
gi|71910408	ATP-dependent nuclease subunit A [Streptococcus pyogenes MGAS5005]
gi|71911311	molecular chaperone DnaK [Streptococcus pyogenes MGAS5005]
gi|71911219	copAB ATPase metal-fist type repressor [Streptococcus pyogenes MGAS5005]
gi|71911495	multiple sugar transport ATP-binding protein [Streptococcus pyogenes MGAS5005]
